# Supplementary material for: Determining the thermal characteristics of breast cancer based on high-resolution infrared imaging, 3D breast scans, and magnetic resonance imaging
Source: PubMed Central journal article supplement (PMC7308290; doi:10.1038/s41598-020-66926-6), 2020-06-22
Supplement: 41598_2020_66926_MOESM1_ESM.pdf [file 41598_2020_66926_MOESM1_ESM.pdf]

# Determining the thermal characteristics of breast cancer based on high-resolution infrared imaging, 3D breast scans, and magnetic resonance imaging

**Adolfo Lozano III<sup>1,2</sup>, Jody C. Hayes<sup>3</sup>, Lindsay M. Compton<sup>3</sup>, Jamasp Azarnoosh<sup>1</sup>, and Fatemeh Hassanipour<sup>1,\*</sup>**

<sup>1</sup>Department of Mechanical Engineering, The University of Texas at Dallas, 800 W Campbell Rd, Mailstop EC-38, Richardson, TX 75080, USA

<sup>2</sup>Raytheon Space and Airborne Systems, 13510 North Central Expressway, Mailstop 212, Dallas, TX 75243, USA

<sup>3</sup>Department of Radiology, The University of Texas Southwestern Medical Center, 5323 Harry Hines Blvd., Dallas, TX 75390, USA

\*fatemeh@utdallas.edu

## Supplementary Information

**Supplementary Figure S1:** Subject 03's right-view static infrared image (exported from FLIR ResearchIR Max).

**Supplementary Figure S2:** Subject 03's frontal-view static infrared image (exported from FLIR ResearchIR Max).

**Supplementary Figure S3:** Subject 03's left-view static infrared image (exported from FLIR ResearchIR Max).

**Supplementary Figure S4:** Subject 03's right-view static infrared image (processed in Mathworks MATLAB).

**Supplementary Figure S5:** Subject 03's frontal-view static infrared image (processed in Mathworks MATLAB).

**Supplementary Figure S6:** Subject 03's left-view static infrared image (processed in Mathworks MATLAB).
